# Supplementary material for: Exploratory Metabolomic Analysis Based on Reversed-Phase Liquid Chromatography–Mass Spectrometry to Study an In Vitro Model of Hypoxia-Induced Metabolic Alterations in HK-2 Cells
Source: MDPI journal article supplement (doi:10.3390/ijms22147399), 2021-07-09
Supplement: s1 [file s1]

**Exploratory metabolomic analysis based on reverse phase liquid chromatography-mass spectrometry to study an *in vitro* model of hypoxia-induced metabolic alterations in HK-2 cells**

Samuel Bernardo-Bermejo<sup>1</sup>, Elena Sánchez-López<sup>2#</sup>, Lei Tan<sup>1,3</sup>, Selma Benito-Martínez<sup>4,5</sup>, Zhengjin Jiang<sup>3</sup>, María Castro-Puyana<sup>1,6</sup>, Francisco Javier Lucio Cazaña<sup>4</sup>,  
María Luisa Marina<sup>1,6\*</sup>

<sup>1</sup>Universidad de Alcalá. Departamento de Química Analítica, Química Física e Ingeniería Química. Ctra. Madrid-Barcelona Km. 33.600, 28871, Alcalá de Henares (Madrid), Spain.

<sup>2</sup>Department of Human Genetics, Leiden University Medical Center, Leiden, the Netherlands.

<sup>3</sup>Institute of Pharmaceutical Analysis, College of Pharmacy, Jinan University, Guangzhou, 510632, China.

<sup>4</sup>Universidad de Alcalá. Departamento de Biología de Sistemas, Ctra. Madrid-Barcelona Km. 33.600, 28871 Alcalá de Henares (Madrid), Spain.

<sup>5</sup>Universidad de Alcalá. Ramón y Cajal” Health Research Institute (IRYCIS), Madrid, Spain.

<sup>6</sup>Universidad de Alcalá. Instituto de Investigación Química Andrés M. del Río. Ctra. Madrid-Barcelona Km. 33.600, 28871, Alcalá de Henares (Madrid), Spain.

# **Current affiliation:** Center for Proteomics and Metabolomics, Leiden University Medical Center, Leiden, the Netherlands.

**\*Correspondence:** Universidad de Alcalá. Departamento de Química Analítica, Química Física e Ingeniería Química. Ctra. Madrid-Barcelona Km. 33.600, 28871, Alcalá de Henares, Madrid, España.

**E-mail:** mluisa.marina@uah.es

**Fax:** +34-91 885 4971

**Tel:** +34-91 885 4935

## Figures

**Figure S1.** Permutation tests of PLS-DA models at short times.

**Figure S2.** Total ion chromatograms of four samples of the two metabolomic sequences at long times: A) Control sample at 48 h of intracellular fluid, B) Hypoxia sample at 48 h of intracellular fluid, C) Control sample at 48 h of extracellular fluid, D) Hypoxia sample at 48 h of extracellular fluid. Experimental conditions detailed on *section 3.5*.

**Figure S3.** Permutation tests of PLS-DA models at long times.

**Figure S4.** Box-plots of the common metabolites identified in the intracellular fluid at short and long times. The p-value of Mann Whitney U test is included.

**Figure S5.** Box-plots of the common metabolites identified in the extracellular fluid at short and long times. The p-value of Mann Whitney U test is included.

**Figure S6.** Box-plots of the metabolites identified in the intracellular fluid at short or long times. The p-value of Mann Whitney U test is included.

**Figure S7.** Box-plots of the common metabolites identified in the extracellular fluid at short and long times. The p-value of Mann Whitney U test is included.

Figure S1

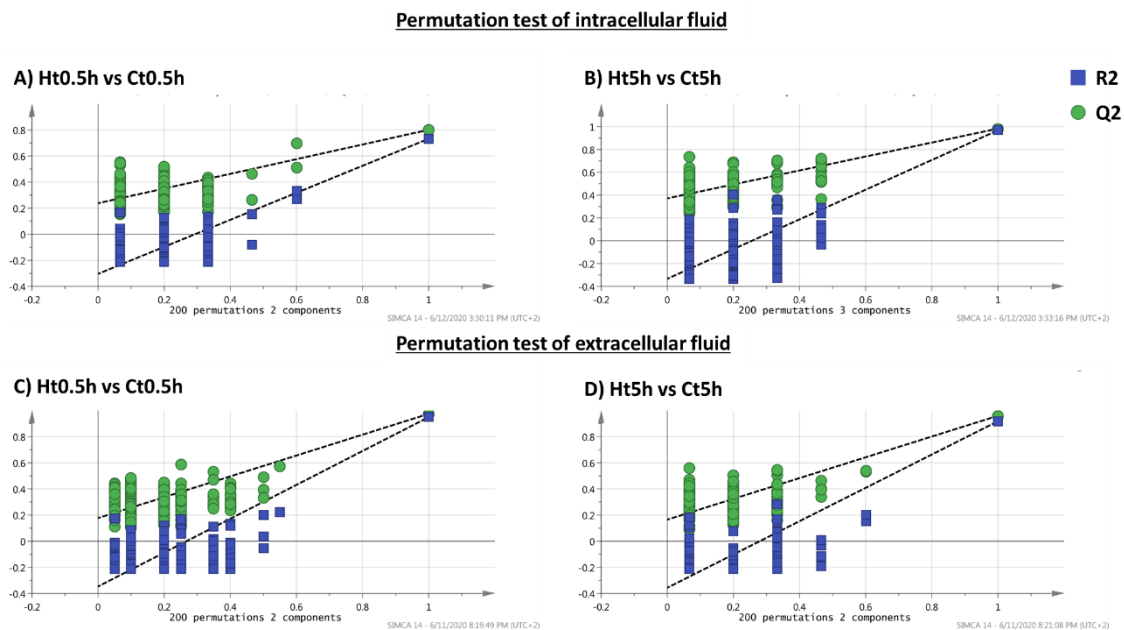

**Figure S2.**

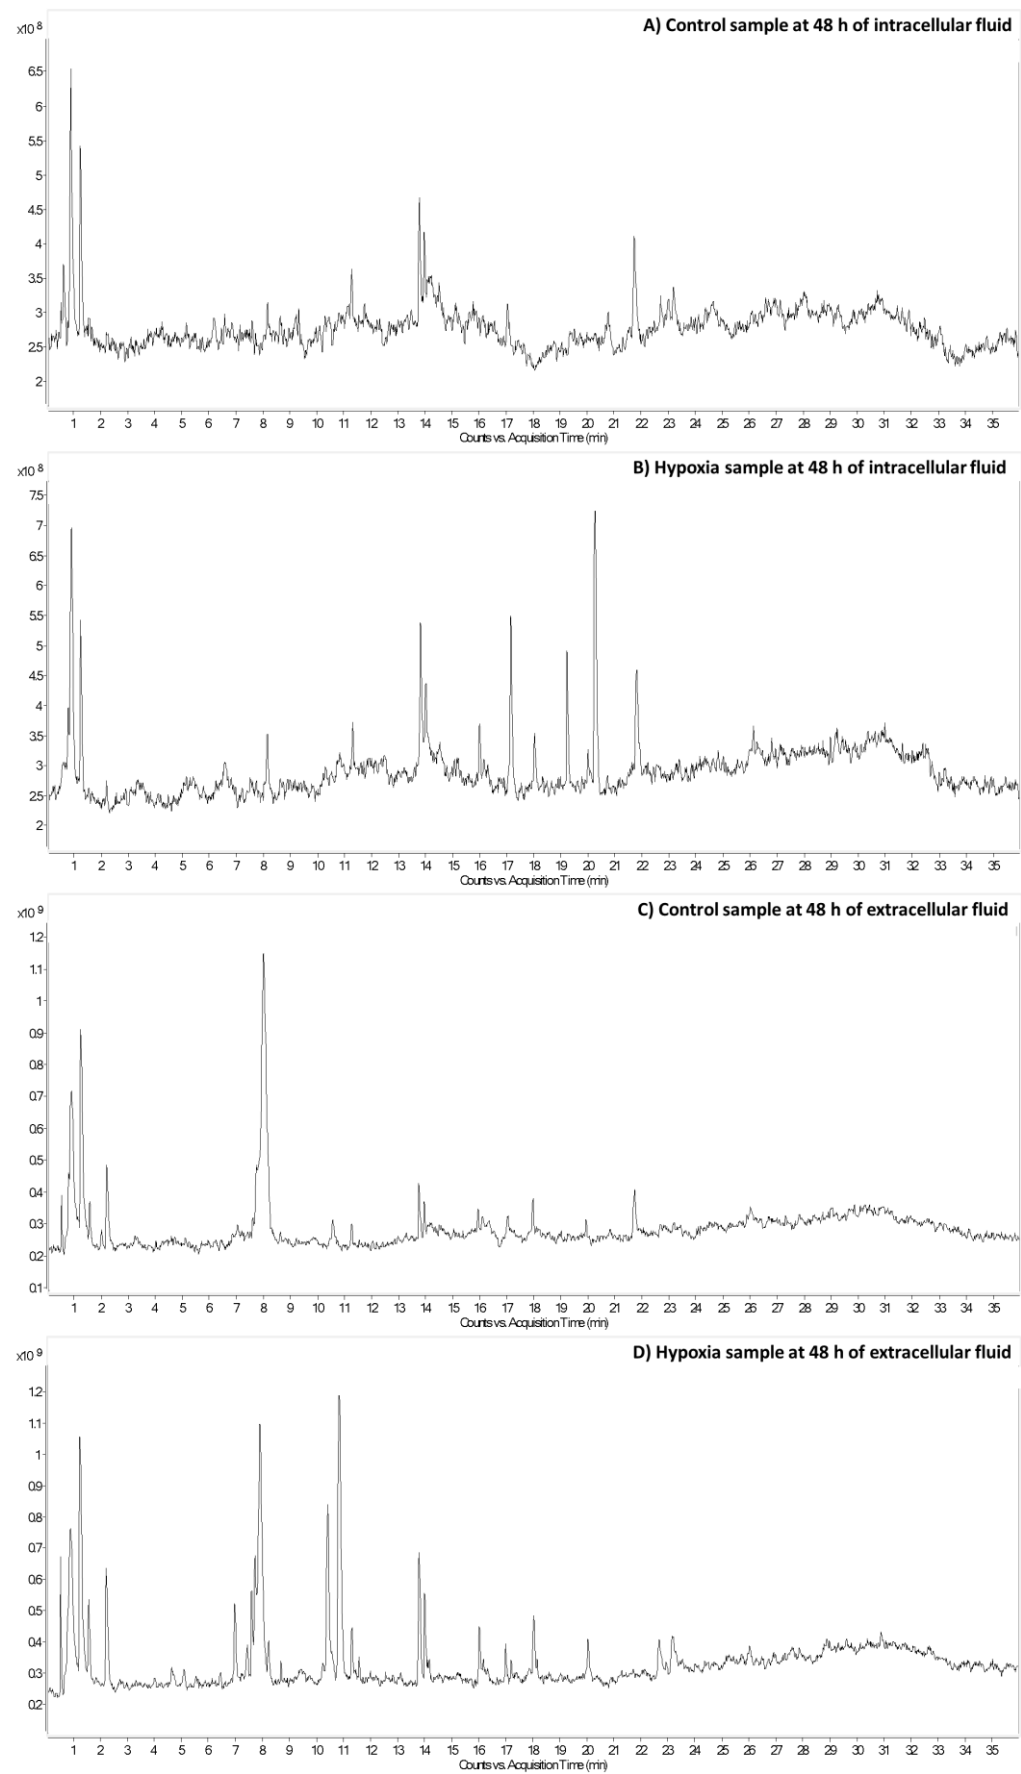

Figure S3

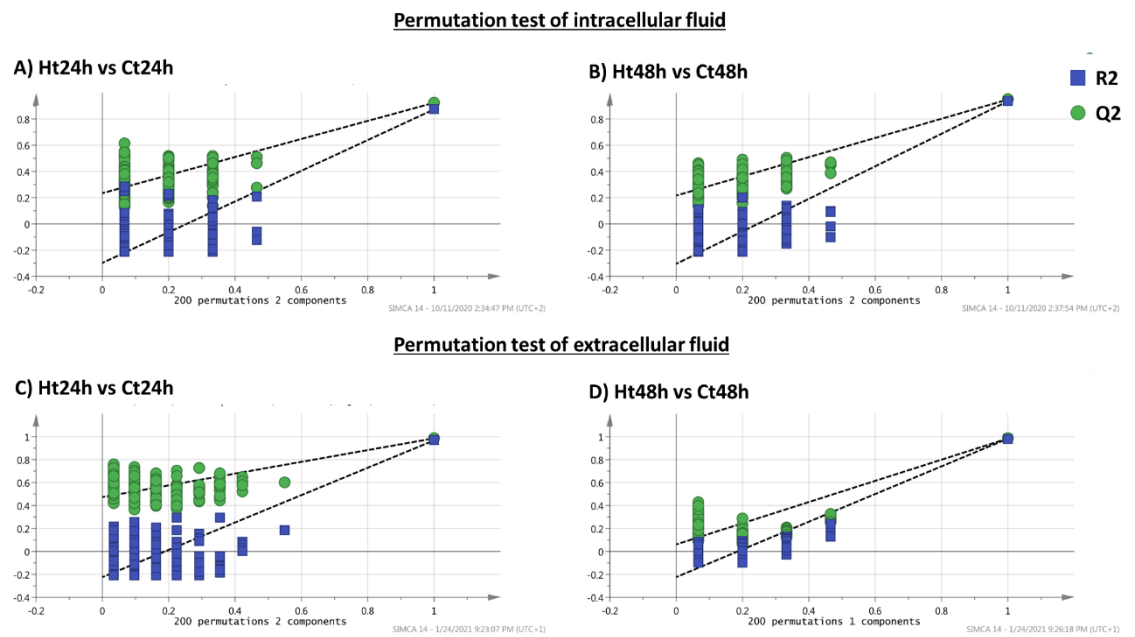

Figure S4

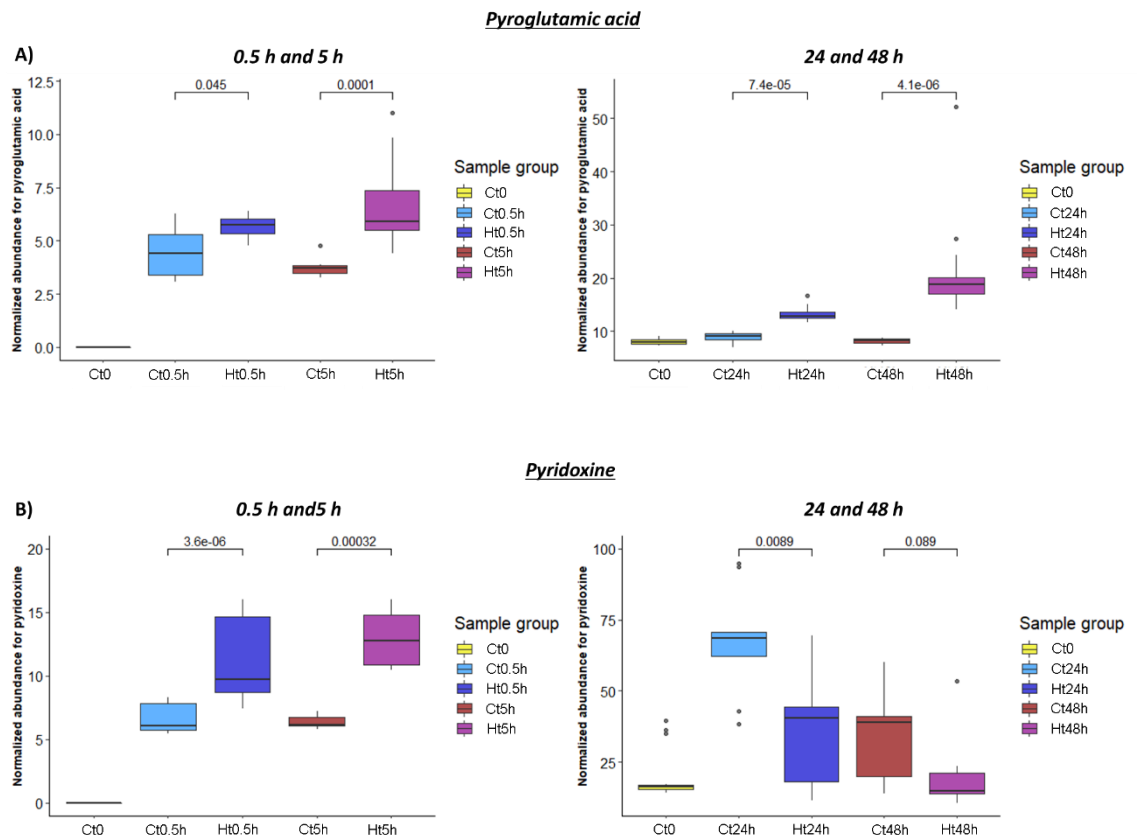

Figure S5

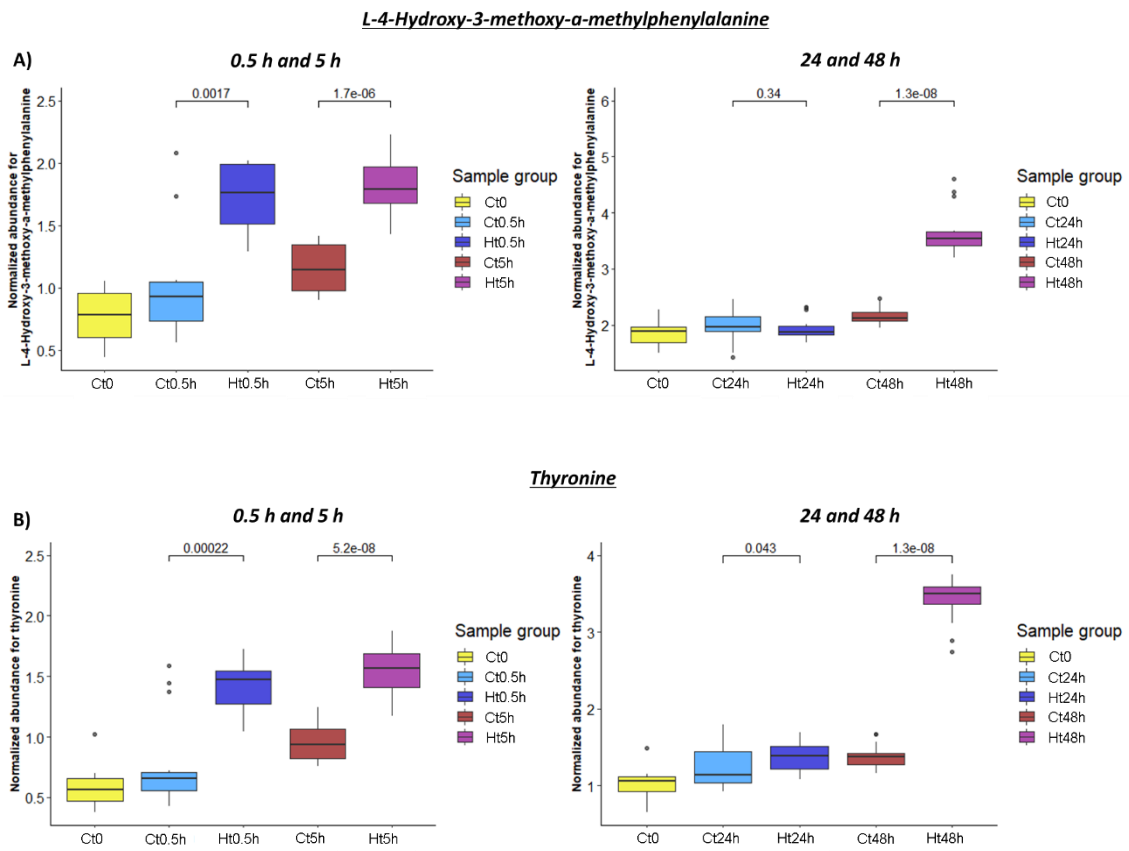



Figure S6

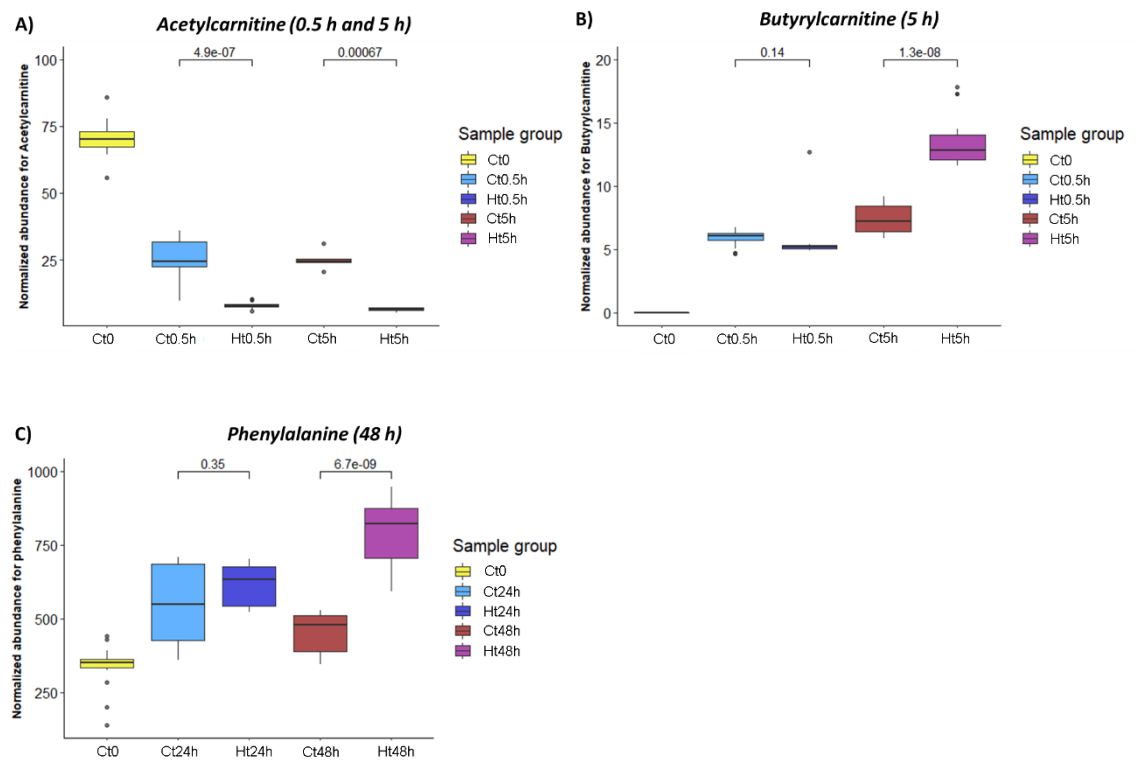

**Figure S7**

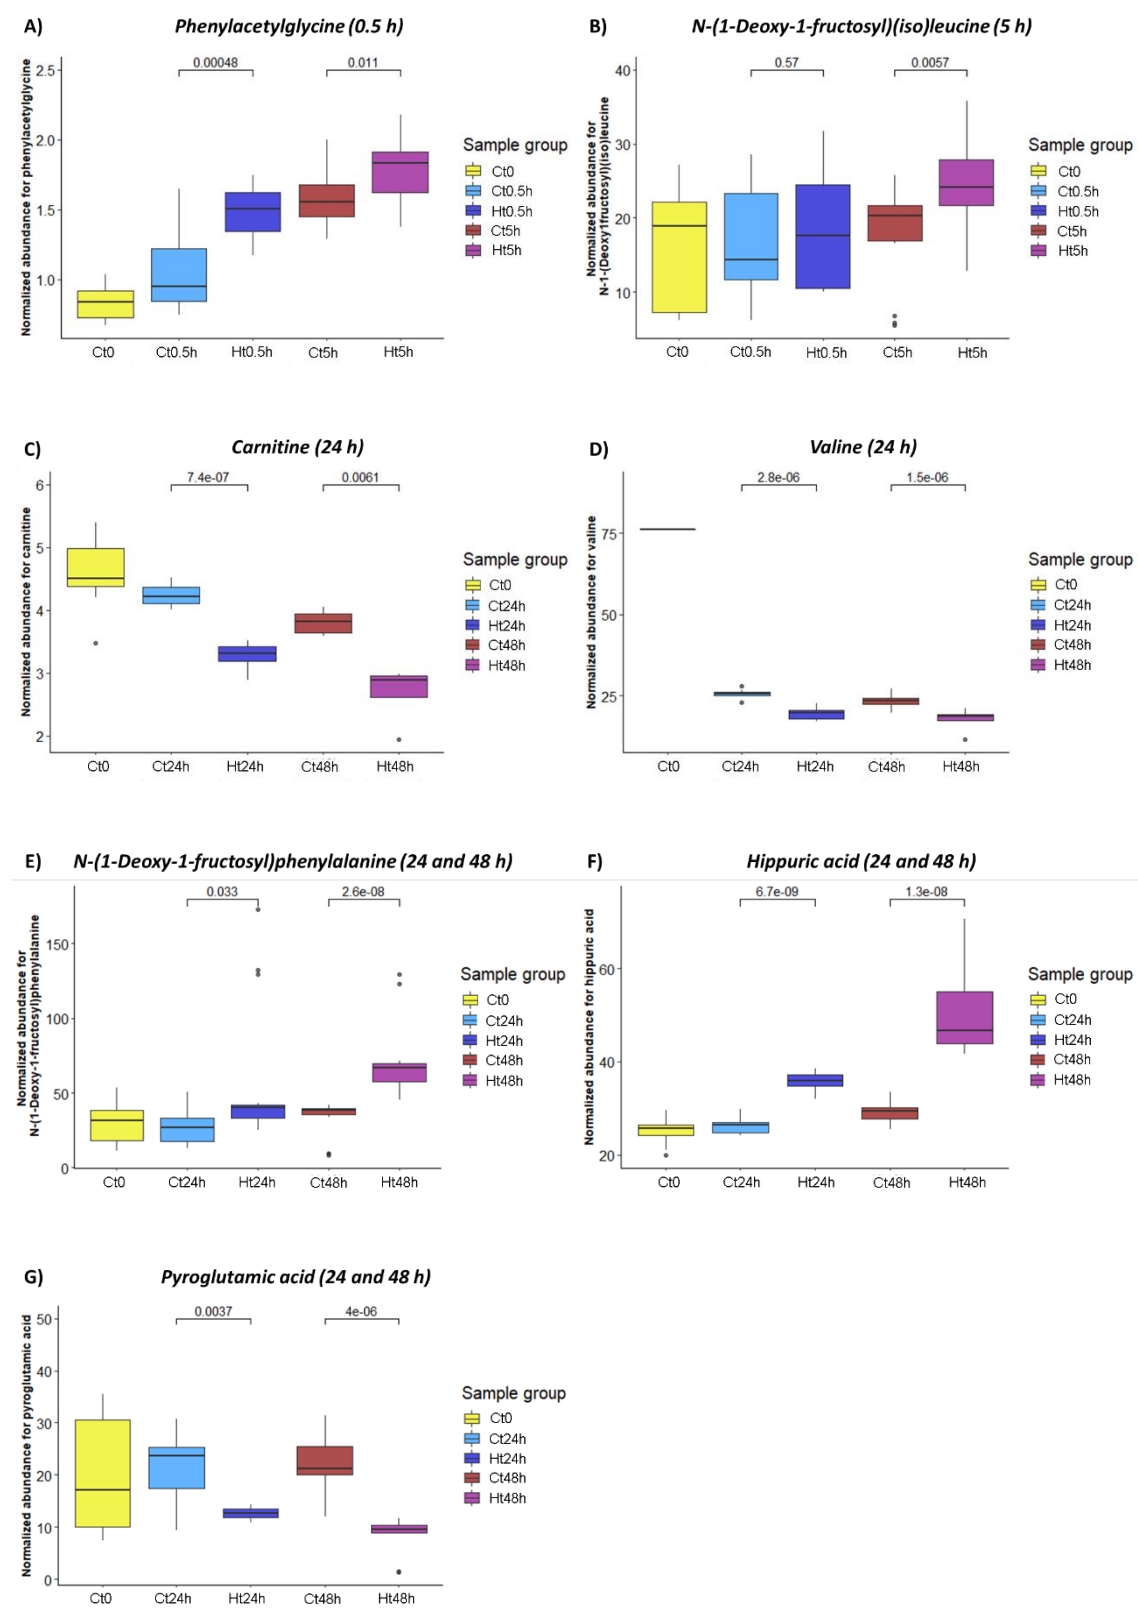

**Table S1.** Unknown molecular features (identification level of 4 according to [19]). in the intracellular and extracellular fluid analysis at 0.5 and 5 h.

| #                                        | RT<br>(min) | Monoisotopic<br>mass (Da) | Main fragments (MS/MS)       | VIP (Trend*)     |              |
|------------------------------------------|-------------|---------------------------|------------------------------|------------------|--------------|
|                                          |             |                           |                              | Ht0.5h vs Ct0.5h | Ht5h vs Ct5h |
| Intracellular fluid                      |             |                           |                              |                  |              |
| Significant metabolites at 0.5 h         |             |                           |                              |                  |              |
| 1                                        | 2.9         | 113.0842                  | 55.0537, 69.0685             | 1.30 (↑)         | 0.04 (↑)     |
| 2                                        | 1.1         | 161.0520                  | -                            | 1.17 (↓)         | 0.94 (↓)     |
| 3                                        | 10.6        | 366.1278                  | 160.0421, 217.0634           | 1.03 (↑)         | 0.13         |
| Significant metabolites at 5 h           |             |                           |                              |                  |              |
| 4                                        | 0.7         | 103.1011                  | -                            | 0.19 (↓)         | 1.09 (↓)     |
| 5                                        | 14.0        | 273.2696                  | -                            | 0.73             | 1.59 (↓)     |
| 6                                        | 14.2        | 317.2957                  | 88.0756, 57.0696, 70.0643    | 0.21             | 1.37 (↓)     |
| 7                                        | 16.2        | 301.3001                  | 256.2625, 88.0756, 219.1733  | 0.05             | 1.24 (↓)     |
| Significant metabolites at 0.5 h and 5 h |             |                           |                              |                  |              |
| 8                                        | 1.7         | 219.1123                  | 90.0547. 72.0439. 98.0230    | 1.21 (↓)         | 1.59 (↓)     |
| 9                                        | 7.6         | 760.1953                  | 298.0556. 473.1246           | 2.51 (↑)         | 1.56 (↑)     |
| 10                                       | 8.0         | 308.1218                  | 174.0576. 128.0519           | 1.05 (↑)         | 1.77 (↑)     |
| 11                                       | 8.1         | 352.1120                  | 174.0578. 160.0421. 128.0525 | 1.83 (↑)         | 1.63 (↑)     |
| 12                                       | 9.4         | 455.1216                  | -                            | 1.44 (↓)         | 1.35 (↓)     |
| 13                                       | 17.5        | 303.2956                  | 91.0544. 58.0658             | 2.52 (↓)         | 2.19 (↓)     |
| 14                                       | 18.3        | 329.3319                  | 87.0748. 70.0647. 106.0854   | 1.08 (↓)         | 1.63 (↓)     |
| 15                                       | 19.5        | 331.3270                  | 91.0546. 58.0660             | 2.44 (↓)         | 2.33 (↓)     |
| 16                                       | 20.6        | 325.3745                  | 186.2201                     | 2.57 (↓)         | 2.32 (↓)     |
| Extracellular fluid                      |             |                           |                              |                  |              |
| Significant metabolites at 0.5 h         |             |                           |                              |                  |              |
| 17                                       | 1.0         | 562.2164                  | -                            | 1.46 (↑)         | 0.70 (↑)     |
| 18                                       | 7.1         | 415.0885                  | 176.07139, 241.0301          | 1.80 (↑)         | 0.98 (↑)     |
| 19                                       | 7.1         | 240.0257                  | -                            | 1.74 (↑)         | 0.93 (↑)     |
| 20                                       | 15.3        | 386.1751                  | 105.0696, 121.0646           | 1.45 (↑)         | 0.43         |
| Significant metabolites at 5 h           |             |                           |                              |                  |              |
| 21                                       | 0.9         | 85.0896                   | 56.0478, 57.0555             | 0.26             | 1.01 (↓)     |
| 22                                       | 1.2         | 248.1280                  | 29.1219, 174.1030, 189.1112  | 0.33             | 1.08 (↓)     |
| 23                                       | 1.3         | 349.1103                  | 143.0296, 230.0785, 201.0580 | 0.35             | 1.30 (↑)     |
| 24                                       | 1.4         | 138.1147                  | 83.0592                      | 0.44             | 1.98 (↓)     |
| 25                                       | 6.3         | 480.2100                  | 84.0805, 147.1162, 130.0862  | 0.00             | 2.52 (↑)     |
| 26                                       | 6.3         | 187.1216                  | 56.0544, 83.0849, 97.1010    | 0.09             | 1.25 (↓)     |

**Table S1** (continued)

| #                                             | RT<br>(min) | Monoisotopic<br>mass (Da) | Main fragments (MS/MS)       | VIP (Trend*)     |              |
|-----------------------------------------------|-------------|---------------------------|------------------------------|------------------|--------------|
|                                               |             |                           |                              | Ht0.5h vs Ct0.5h | Ht5h vs Ct5h |
| 27                                            | 7.1         | 256.0974                  | 186.1047                     | 0.55 (↓)         | 1.27 (↓)     |
| 28                                            | 7.5         | 159.0359                  | 87.0257, 70.0641, 114.0353   | 0.00             | 1.31 (↑)     |
| 29                                            | 7.7         | 606.1010                  | -                            | 0.00             | 1.45 (↑)     |
| 30                                            | 8.2         | 453.1583                  | 160.0413, 277.1199           | 0.00             | 1.2 (↑)      |
| 31                                            | 8.9         | 453.1067                  | 91.0548, 156.0852            | 0.00             | 1.5 (↑)      |
| 32                                            | 9.2         | 354.0587                  | 261.0211, 273.0901           | 0.91 (↑)         | 1.02 (↑)     |
| 33                                            | 11.0        | 159.0358                  | 114.0371, 87.0257            | 0.73             | 2.61 (↑)     |
| 34                                            | 11.0        | 1161.1360                 | -                            | 0.84 (↑)         | 1.18 (↑)     |
| 35                                            | 14.3        | 289.2633                  | 242.2479, 88.0750, 56.0493   | 0.29 (↑)         | 1.02 (↑)     |
| 36                                            | 14.6        | 449.3731                  | 344.3134                     | 0.43 (↑)         | 1.15 (↑)     |
| <b>Significant metabolites at 0.5 and 5 h</b> |             |                           |                              |                  |              |
| 37                                            | 1.0         | 296.0949                  | 122.0707                     | 2.29 (↓)         | 1.82 (↓)     |
| 38                                            | 1.1         | 159.0689                  | 130.0648, 143.0700, 115.0526 | 1.13 (↑)         | 2.30 (↑)     |
| 39                                            | 1.3         | 264.0709                  | 120.0783, 175.0158           | 1.12 (↑)         | 2.15 (↑)     |
| 40                                            | 2.1         | 301.1897                  | -                            | 1.58 (↑)         | 1.56 (↑)     |
| 41                                            | 2.9         | 113.0844                  | 55.0538, 69.0697, 79.0539    | 1.99 (↑)         | 1.24 (↑)     |
| 42                                            | 4.9         | 179.0956                  | 91.0527, 62.0591             | 1.14 (↑)         | 2.09 (↑)     |
| 43                                            | 5.7         | 239.1171                  | 194.1175, 126.0534           | 1.79 (↑)         | 1.45 (↑)     |
| 44                                            | 5.9         | 554.2221                  | 247.1024                     | 1.80 (↑)         | 1.78 (↑)     |
| 45                                            | 6.5         | 508.2161                  | 201.0982                     | 2.67 (↑)         | 2.63 (↑)     |
| 46                                            | 6.6         | 480.2109                  | 322.1757, 147.1114, 84.0803  | 2.72 (↑)         | 2.77 (↑)     |
| 47                                            | 6.6         | 321.1699                  | 84.0786, 130.0855, 147.1179  | 2.65 (↑)         | 2.69 (↑)     |
| 48                                            | 6.6         | 159.0358                  | 114.0372, 87.0273            | 2.62 (↑)         | 2.62 (↑)     |
| 49                                            | 6.6         | 489.1730                  | 156.0766, 331.1418           | 2.53 (↑)         | 2.18 (↑)     |
| 50                                            | 7.1         | 574.1303                  | 416.09380, 241.0301          | 1.88 (↑)         | 1.07 (↑)     |
| 51                                            | 7.1         | 159.0358                  | 114.0349, 87.0267            | 1.85 (↑)         | 1.03 (↑)     |
| 52                                            | 7.3         | 480.2097                  | 84.0807, 130.0852            | 3.13 (↑)         | 2.83 (↑)     |
| 53                                            | 7.5         | 574.1280                  | 241.0289, 160.0402           | 2.83 (↑)         | 1.45 (↑)     |
| 54                                            | 7.5         | 480.1702                  | 147.0756                     | 2.38 (↑)         | 2.53 (↑)     |
| 55                                            | 7.9         | 439.1425                  | 160.0412, 114.0364           | 2.55 (↑)         | 1.65 (↑)     |
| 56                                            | 8.1         | 409.1321                  | 160.0418, 114.0371           | 2.46 (↑)         | 2.68 (↑)     |
| 57                                            | 8.3         | 242.0818                  | 198.0626, 172.0862           | 1.15 (↑)         | 1.12 (↑)     |
| 58                                            | 18          | 356.2719                  | -                            | 1.31 (↑)         | 1.22 (↑)     |
| 59                                            | 20.3        | 357.3628                  | 88.0738, 54.0757, 71.0780    | 1.46 (↑)         | 1.24 (↑)     |

\*\*↑: The metabolite (on average) is more abundant in hypoxia condition; ↓: The metabolite (on average) is less abundant in hypoxia condition.

**Table S2.** Unknown molecular features (identification level of 4 according to [19]) in the intracellular and extracellular fluid analysis at 24 and 48 h.

| #                                      | RT<br>(min) | Monoisotopic<br>mass (Da) | Main fragments (MS/MS)               | VIP (Trend)    |                |
|----------------------------------------|-------------|---------------------------|--------------------------------------|----------------|----------------|
|                                        |             |                           |                                      | Ht24h vs Ct24h | Ht48h vs Ct48h |
| Intracellular fluid                    |             |                           |                                      |                |                |
| Significant metabolites at 24 h        |             |                           |                                      |                |                |
| 1                                      | 8.1         | 217.2042                  | 70.0646, 88.0754, 57.0699            | 1.17 (↑)       | 0.99 (↑)       |
| Significant metabolites at 48 h        |             |                           |                                      |                |                |
| 2                                      | 0.7         | 161.1040                  | 90.0545                              | 0.25 (↑)       | 1.01 (↑)       |
| 3                                      | 0.9         | 131.0941                  | 86.0963, 69.0698                     | 0.32 (↑)       | 1.02 (↑)       |
| 4                                      | 8.1         | 352.1092                  | 174.0578, 160.0424, 128.0524         | 0.56 (↓)       | 1.55 (↑)       |
| 5                                      | 11.3        | 245.2356                  | 88.0757, 57.0701, 70.0654            | 0.90 (↑)       | 1.00 (↑)       |
| Significant metabolites at 24 and 48 h |             |                           |                                      |                |                |
| 6                                      | 8.6         | 261.2304                  | 80.0757, 70.0656, 57.0701            | 1.11 (↑)       | 1.06 (↑)       |
| 7                                      | 13.8        | 273.2668                  | 88.07533, 57.0700, 70.0650, 106.0858 | 1.30 (↑)       | 1.10 (↑)       |
| 8                                      | 14.0        | 317.2929                  | 256.2630, 88.0756                    | 1.21 (↑)       | 1.04 (↑)       |
| 9                                      | 16.0        | 301.2984                  | -                                    | 1.22 (↑)       | 1.16 (↑)       |
| 10                                     | 17.2        | 303.2930                  | 91.0540, 58.0653, 212.2367           | 3.11 (↑)       | 1.90 (↑)       |
| 11                                     | 18.0        | 329.3297                  | 88.0755, 57.0702                     | 1.34 (↑)       | 1.36 (↑)       |
| 12                                     | 19.2        | 331.3244                  | 91.0538, 58.0653, 240.2672           | 2.25 (↑)       | 1.93 (↑)       |
| Extracellular fluid                    |             |                           |                                      |                |                |
| Significant metabolites at 24 h        |             |                           |                                      |                |                |
| 1                                      | 0.8         | 132.0223                  | 87.0989, 70.0702                     | 1.04 (↑)       | 0.73 (↑)       |
| 2                                      | 1.2         | 281.1115                  | 150.0731                             | 1.74 (↑)       | 0.00           |
| 3                                      | 1.6         | 446.2217                  | -                                    | 1.12 (↑)       | 0.41 (↑)       |
| 4                                      | 1.7         | 443.1282                  | -                                    | 1.02 (↑)       | 0.00           |
| 5                                      | 3.7         | 191.0577                  | -                                    | 1.12 (↑)       | 0.78 (↑)       |
| 6                                      | 4.2         | 245.1617                  | 85.0279                              | 1.07 (↑)       | 0.62 (↓)       |
| 7                                      | 6.1         | 246.1686                  | 85.0289                              | 1.05 (↑)       | 0.49 (↑)       |
| 8                                      | 6.2         | 466.1885                  | 308.1602, 70.0645                    | 2.35 (↑)       | 0.34 (↑)       |
| 9                                      | 6.2         | 307.1536                  | -                                    | 1.95 (↑)       | 0.75 (↑)       |
| 10                                     | 6.4         | 230.1733                  | -                                    | 1.17 (↑)       | 0.50 (↑)       |
| 11                                     | 6.4         | 321.1683                  | 84.0811, 130.0891, 141.1048          | 1.49 (↑)       | 0.89 (↑)       |
| 12                                     | 6.4         | 480.2040                  | 322.1754, 84.0808, 147.1121          | 1.57 (↑)       | 0.97 (↑)       |
| 13                                     | 6.8         | 485.1283                  | 454.1079                             | 3.28 (↓)       | 0.00 (↓)       |

**Table S2.** (continued)

| #                                      | RT<br>(min) | Monoisotopic<br>mass (Da) | Main fragments (MS/MS)      | VIP (Trend)    |                |
|----------------------------------------|-------------|---------------------------|-----------------------------|----------------|----------------|
|                                        |             |                           |                             | Ht24h vs Ct24h | Ht48h vs Ct48h |
| 14                                     | 7.3         | 452.3350                  | 86.0966, 309.8652           | 1.18 (↑)       | 0.82 (↑)       |
| 15                                     | 7.8         | 439.1406                  | 160.0429                    | 2.54 (↑)       | 0.20           |
| 16                                     | 8.1         | 646.2235                  | 315.0941                    | 2.48 (↓)       | 0.00           |
| 17                                     | 8.3         | 1471.5847                 | -                           | 1.07 (↑)       | 0.20           |
| <b>Intracellular fluid</b>             |             |                           |                             |                |                |
| 18                                     | 10.4        | 159.0349                  | 114.0370, 87.0271           | 2.11 (↑)       | 0.84 (↑)       |
| 19                                     | 16.0        | 257.2717                  | 62.0621, 174.9822           | 1.21 (↑)       | 0.33 (↑)       |
| 20                                     | 16.1        | 473.2521                  | 60.0554                     | 1.01 (↑)       | 0.66 (↑)       |
| 21                                     | 16.2        | 317.2923                  | 270.2830, 88.0750           | 1.11 (↑)       | 0.60 (↑)       |
| 22                                     | 17.2        | 303.2928                  | 91.0557, 212.2369           | 2.35 (↑)       | 0.00           |
| 23                                     | 18.0        | 329.3294                  | 88.0757, 57.0700            | 1.37 (↑)       | 0.18 (↑)       |
| 24                                     | 18.2        | 345.3236                  | 298.3080, 74.0568, 56.0478  | 1.17 (↑)       | 0.46 (↑)       |
| 25                                     | 18.2        | 528.5210                  | 256.2639                    | 1.57 (↑)       | 0.12 (↑)       |
| 26                                     | 18.7        | 399.3712                  | 338.3439, 57.0681, 102.0951 | 1.58 (↑)       | 0.38 (↑)       |
| 27                                     | 19.0        | 399.3698                  | 338.3389, 88.0738, 100.9248 | 1.32 (↑)       | 0.98 (↑)       |
| 28                                     | 19.9        | 556.5537                  | 256.2631, 284.2921          | 1.20 (↑)       | 0.47 (↓)       |
| 29                                     | 26.0        | 330.2740                  | 57.0705, 71.0840, 95.0817   | 1.47 (↑)       | 0.04 (↑)       |
| 30                                     | 26.7        | 530.2727                  | 119.0852                    | 1.08 (↑)       | 0.07           |
| 31                                     | 31.0        | 679.3579                  | -                           | 1.71 (↑)       | 0.42 (↑)       |
| <b>Significant metabolites at 48 h</b> |             |                           |                             |                |                |
| 32                                     | 0.5         | 262.1387                  | 86.0956, 132.0998           | 0.73 (↑)       | 1.05 (↑)       |
| 33                                     | 0.5         | 595.2805                  | -                           | 0.47           | 1.11 (↑)       |
| 34                                     | 0.8         | 244.1412                  | -                           | 0.41           | 1.26 (↑)       |
| 35                                     | 0.9         | 175.0615                  | 70.0627, 60.0529            | 0.67 (↑)       | 1.21 (↑)       |
| 36                                     | 0.9         | 153.0756                  | -                           | 0.82 (↑)       | 1.33 (↑)       |
| 37                                     | 1.3         | 583.1634                  | 210.0453                    | 0.61           | 1.47 (↑)       |
| 38                                     | 1.3         | 593.1157                  | 210.0518                    | 0.05 (↓)       | 1.16 (↑)       |
| 39                                     | 1.3         | 330.1541                  | 120.0802, 166.0910          | 0.84 (↑)       | 1.06 (↑)       |
| 40                                     | 1.3         | 367.1228                  | 203.0509, 188.0679          | 0.28           | 1.44 (↓)       |
| 41                                     | 1.4         | 250.0642                  | 137.0442                    | 0.62 (↑)       | 1.08 (↑)       |
| 42                                     | 1.6         | 219.1096                  | -                           | 0.94 (↑)       | 1.22 (↑)       |
| 43                                     | 1.7         | 246.1204                  | 86.0947                     | 0.87           | 1.42 (↑)       |
| 44                                     | 2.2         | 408.1789                  | 188.0698                    | 0.62           | 1.23 (↑)       |
| 45                                     | 2.2         | 242.0453                  | -                           | 0.47           | 1.41 (↑)       |
| 46                                     | 2.2         | 226.0714                  | -                           | 0.62           | 1.31 (↑)       |

**Table S2.** (continued)

| #  | RT<br>(min) | Monoisotopic<br>mass (Da) | Main fragments (MS/MS)                 | VIP (Trend)    |                |
|----|-------------|---------------------------|----------------------------------------|----------------|----------------|
|    |             |                           |                                        | Ht24h vs Ct24h | Ht48h vs Ct48h |
| 47 | 2.3         | 287.1155                  | -                                      | 0.85 (↑)       | 1.33 (↑)       |
| 48 | 3.5         | 246.1372                  | 146.0573, 188.0718                     | 0.82           | 1.05 (↑)       |
| 49 | 3.5         | 257.0724                  | 164.0642, 126.0526                     | 0.38           | 1.30 (↑)       |
| 50 | 3.6         | 877.3352                  | 107.04627, 182.0818, 165.0543          | 0.02           | 1.51 (↑)       |
| 51 | 3.7         | 329.1584                  | 106.04820, 197.1235, 86.0935           | 0.24 (↑)       | 1.27 (↑)       |
| 52 | 4.3         | 135.0680                  | 91.0538                                | 0.60           | 1.27 (↑)       |
| 53 | 4.4         | 265.1310                  | 85.0273                                | 0.54 (↑)       | 1.55 (↑)       |
| 54 | 4.6         | 412.1338                  | 136.0605, 281.0978, 162.0403           | 0.91 (↑)       | 1.33 (↑)       |
| 55 | 4.7         | 266.0904                  | 120.0442                               | 0.09           | 1.12 (↑)       |
| 56 | 5.5         | 239.1158                  | 194.1179, 126.0536                     | 0.32           | 1.14 (↑)       |
| 57 | 6.1         | 187.1204                  | 83.0849, 97.1003, 55.0541              | 0.70           | 1.13 (↑)       |
| 58 | 6.1         | 334.0982                  | 289.10003, 128.0521, 159.0895, 91.0534 | 0.87           | 3.13 (↑)       |
| 59 | 7.0         | 159.0352                  | 114.0370, 87.0268                      | 0.89           | 1.85 (↑)       |
| 60 | 7.0         | 578.1194                  | 243.0216, 418.0825                     | 0.00           | 1.76 (↑)       |
| 61 | 7.1         | 480.2039                  | 84.0804, 147.1116, 130.0856            | 0.87           | 1.86 (↑)       |
| 62 | 7.4         | 159.0351                  | 114.0385, 87.0245                      | 0.00           | 2.44 (↑)       |
| 63 | 7.6         | 606.0944                  | 448.0646, 273.0032                     | 0.00           | 1.37 (↑)       |
| 64 | 7.7         | 330.1010                  | 253.1240                               | 0.46           | 1.18 (↑)       |
| 65 | 7.8         | 346.0747                  | -                                      | 0.28           | 1.33 (↑)       |
| 66 | 7.8         | 638.2195                  | 331.1081                               | 0.01           | 1.74 (↑)       |
| 67 | 7.8         | 616.2380                  | 309.1263                               | 0.28           | 1.56 (↑)       |
| 68 | 8.2         | 334.0983                  | 217.0644, 202.0300                     | 0.53           | 1.38 (↑)       |
| 69 | 8.2         | 393.1468                  | -                                      | 0.58           | 1.95 (↑)       |
| 70 | 8.8         | 453.1027                  | 91.0534, 139.0849, 176.0679            | 0.82           | 1.72 (↑)       |
| 71 | 9.8         | 231.2189                  | 70.0633, 106.0843, 85.0276             | 0.70           | 1.07 (↑)       |
| 72 | 11.3        | 245.2353                  | 88.0751, 70.0650, 57.0701              | 0.86 (↑)       | 1.26 (↑)       |
| 73 | 11.3        | 201.2088                  | 57.0681                                | 0.90           | 1.44 (↑)       |
| 74 | 11.4        | 465.1926                  | 160.0411, 132.1014, 86.0950            | 0.68           | 2.00 (↑)       |
| 75 | 11.8        | 333.2875                  | 272.2540, 228.2313, 70.0644            | 0.29           | 1.03 (↑)       |
| 76 | 12.1        | 499.1768                  | 166.0836, 160.0415                     | 0.84           | 1.08 (↑)       |
| 77 | 12.6        | 259.2507                  | 57.0677, 70.0651, 95.0761              | 0.99           | 1.66 (↑)       |
| 78 | 13.1        | 465.3079                  | -                                      | 0.73           | 1.14 (↑)       |
| 79 | 14.3        | 449.3712                  | 344.3135                               | 0.90 (↑)       | 1.25 (↑)       |
| 80 | 14.5        | 493.3977                  | 388.3389, 344.3175                     | 0.66 (↑)       | 1.14 (↑)       |
| 81 | 27.9        | 539.5277                  | 256.2628, 311.2939, 284.2938           | 0.64           | 1.10 (↑)       |

**Table S2.** (continued)

| #                                             | RT<br>(min) | Monoisotopic<br>mass (Da) | Main fragments (MS/MS)                 | VIP (Trend)    |                |
|-----------------------------------------------|-------------|---------------------------|----------------------------------------|----------------|----------------|
|                                               |             |                           |                                        | Ht24h vs Ct24h | Ht48h vs Ct48h |
| 82                                            | 30.1        | 595.5914                  | 313.3260                               | 0.45 (↓)       | 1.87 (↓)       |
| <b>Significant metabolites at 24 and 48 h</b> |             |                           |                                        |                |                |
| 83                                            | 0.7         | 166.0814                  | 81.0450, 122.0709, 139.0994            | 1.55 (↓)       | 1.00 (↓)       |
| 84                                            | 0.7         | 382.1053                  | -                                      | 1.53 (↓)       | 1.65 (↓)       |
| 85                                            | 0.7         | 204.0556                  | -                                      | 1.13 (↑)       | 1.09 (↑)       |
| 86                                            | 0.8         | 282.9963                  | 226.0389                               | 1.37 (↑)       | 1.36 (↑)       |
| 87                                            | 0.9         | 386.0913                  | 176.0641                               | 1.18 (↑)       | 1.21 (↑)       |
| 88                                            | 0.9         | 284.1697                  | 154.0840                               | 1.04 (↑)       | 1.21 (↑)       |
| 89                                            | 1.0         | 248.1269                  | 219.1219, 174.1019, 186.0999, 137.0764 | 2.09 (↓)       | 1.71 (↓)       |
| 90                                            | 1.6         | 482.1827                  | 264.0794                               | 1.17 (↑)       | 1.31 (↑)       |
| 91                                            | 1.7         | 231.1459                  | 85.0273                                | 2.04 (↑)       | 1.66 (↑)       |
| 92                                            | 1.9         | 301.1877                  | 102.0903                               | 1.53 (↑)       | 1.53 (↑)       |
| 93                                            | 2.2         | 201.0785                  | 184.0762, 156.0800                     | 1.06 (↑)       | 1.29 (↑)       |
| 94                                            | 2.2         | 187.0629                  | 118.0642, 146.0591                     | 2.07 (↑)       | 1.61 (↑)       |
| 95                                            | 2.3         | 177.1257                  | 91.05667                               | 1.30 (↑)       | 1.43 (↑)       |
| 96                                            | 2.4         | 260.1364                  | -                                      | 1.65 (↑)       | 1.51 (↑)       |
| 97                                            | 2.5         | 297.0890                  | 136.0622                               | 1.93 (↑)       | 1.01 (↑)       |
| 98                                            | 2.7         | 289.0945                  | 244.1010, 126.0534, 110.0374           | 1.38 (↑)       | 1.02 (↑)       |
| 99                                            | 2.8         | 260.1353                  | 86.0964, 132.1010                      | 2.20 (↑)       | 1.24 (↑)       |
| 100                                           | 2.9         | 243.1464                  | -                                      | 1.21 (↑)       | 1.49 (↑)       |
| 101                                           | 3.7         | 245.1619                  | 85.0280                                | 1.46 (↑)       | 1.65 (↑)       |
| 102                                           | 3.8         | 294.1210                  | 120.0805, 166.0870                     | 2.35 (↑)       | 1.61 (↑)       |
| 103                                           | 4.0         | 104.0264                  | 77.0378, 51.0223                       | 1.14 (↑)       | 1.11 (↑)       |
| 104                                           | 4.7         | 441.1390                  | 295.0925                               | 1.05 (↑)       | 1.21 (↑)       |
| 105                                           | 5.1         | 75.0323                   | -                                      | 1.05 (↑)       | 1.69 (↑)       |
| 106                                           | 5.1         | 193.0748                  | -                                      | 1.27 (↑)       | 2.62 (↑)       |
| 107                                           | 5.7         | 1354.5665                 | -                                      | 1.14 (↑)       | 1.29 (↑)       |
| 108                                           | 6.2         | 480.2036                  | 322.1745, 147.1118, 84.0802            | 1.93 (↑)       | 1.41 (↑)       |
| 109                                           | 6.3         | 508.2099                  | 201.0954, 175.1178                     | 1.66 (↑)       | 1.33 (↑)       |
| 110                                           | 6.4         | 159.0353                  | 114.0369                               | 1.54 (↑)       | 1.13 (↑)       |
| 111                                           | 6.4         | 489.1673                  | 156.0765, 110.0704                     | 1.46 (↑)       | 1.69 (↑)       |
| 112                                           | 7.0         | 508.2101                  | 201.0950, 175.1193                     | 1.51 (↑)       | 2.11 (↑)       |
| 113                                           | 7.0         | 415.0869                  | 241.0339, 151.9829, 122.0254           | 2.80 (↑)       | 1.80 (↑)       |
| 114                                           | 7.0         | 574.1220                  | 416.0927, 241.0300                     | 3.62 (↑)       | 2.34 (↑)       |
| 115                                           | 7.4         | 574.1221                  | 416.0932, 241.0298                     | 2.76 (↑)       | 2.98 (↑)       |



**Table S2.** (continued)

| #   | RT<br>(min) | Monoisotopic<br>mass (Da) | Main fragments (MS/MS)                 | VIP (Trend)    |                |
|-----|-------------|---------------------------|----------------------------------------|----------------|----------------|
|     |             |                           |                                        | Ht24h vs Ct24h | Ht48h vs Ct48h |
| 116 | 7.4         | 415.0871                  | 241.0300, 176.0705, 122.0309, 161.9846 | 2.08 (↑)       | 2.39 (↑)       |
| 117 | 7.7         | 670.1566                  | 289.0257, 363.0442, 192.0071           | 1.16 (↓)       | 1.61 (↑)       |
| 118 | 7.9         | 481.1533                  | 160.0424, 148.0622                     | 1.26 (↑)       | 1.10 (↑)       |
| 119 | 8.0         | 409.1304                  | 160.0423, 176.0694                     | 2.25 (↑)       | 1.06 (↑)       |
| 120 | 8.1         | 453.1563                  | 160.0438, 277.1150, 129.1042, 95.2478  | 2.12 (↑)       | 1.53 (↑)       |
| 121 | 8.2         | 439.1410                  | 160.0435                               | 1.16 (↑)       | 1.67 (↑)       |
| 122 | 8.3         | 1605.6796                 | -                                      | 1.27 (↑)       | 1.09 (↑)       |
| 123 | 8.4         | 423.1459                  | 160.0422, 176.0682                     | 1.85 (↑)       | 1.36 (↑)       |
| 124 | 8.8         | 449.1615                  | 116.0703, 160.0420                     | 1.35 (↑)       | 2.00 (↑)       |
| 125 | 10.4        | 424.1300                  | 160.0420, 217.0634                     | 4.03 (↑)       | 3.23 (↑)       |
| 126 | 10.9        | 393.1462                  | 60.0553                                | 2.72 (↑)       | 2.83 (↑)       |
| 127 | 11.4        | 357.3597                  | -                                      | 1.35 (↑)       | 1.55 (↑)       |
| 128 | 11.8        | 319.2872                  | 91.0536, 228.2333, 58.0651             | 2.98 (↑)       | 2.64 (↑)       |
| 129 | 11.9        | 319.2874                  | 91.05307, 58.0649, 228.2335            | 3.03 (↑)       | 2.40 (↑)       |
| 130 | 13.8        | 273.2667                  | 88.0753, 57.0698, 70.0653, 106.0862    | 1.19 (↑)       | 1.47 (↑)       |
| 131 | 13.8        | 229.2404                  | 57.0700                                | 1.06 (↑)       | 1.38 (↑)       |
| 132 | 14.0        | 317.2931                  | -                                      | 1.01 (↑)       | 1.59 (↑)       |
| 133 | 14.1        | 361.3192                  | 300.2883, 70.0649                      | 1.31 (↑)       | 2.06 (↑)       |
| 134 | 14.2        | 405.3450                  | 344.3126, 300.2946                     | 1.08 (↑)       | 1.41 (↑)       |

\*\*↑: The metabolite (on average) is more abundant in hypoxia condition; ↓: The metabolite (on average) is less abundant in hypoxia condition.

**Table S3.** Cell number and protein content of the sample groups at short times.

| Sample group                  | Ct0    | Ct0.5  | Ct5h   | Ht0.5 | Ht5h   |
|-------------------------------|--------|--------|--------|-------|--------|
| Cell number                   | 180000 | 162000 | 161000 | 14900 | 153000 |
| Protein content<br>(mg/500µL) | 0.286  | 0.291  | 0.248  | 0.228 | 0.242  |

**Table S4.** Cell number and protein content of the sample groups at long times.

| Sample group                  | Ct0    | Ct24h  | Ct48h  | Ht24h  | Ht48h  |
|-------------------------------|--------|--------|--------|--------|--------|
| Cell number                   | 221000 | 220000 | 224000 | 217000 | 180000 |
| Protein content<br>(mg/500µL) | 1.076  | 1.062  | 1.130  | 1.085  | 0.984  |
